# Supplementary material for: A model for carbon incorporation from trimethyl gallium in chemical vapor deposition of gallium nitride
Source: Royal Society of Chemistry journal article supplement (doi:10.1039/c5tc03989d), 2015-12-22
Supplement: c5tc03989d1.pdf [file c5tc03989d1.pdf]

### Supporting information.

Visualization of the geometry optimized molecular structures for the adsorbates at vacancy sites of the H-saturated  $(\text{GaN})_{24}$  cluster that are listed in Table 1.

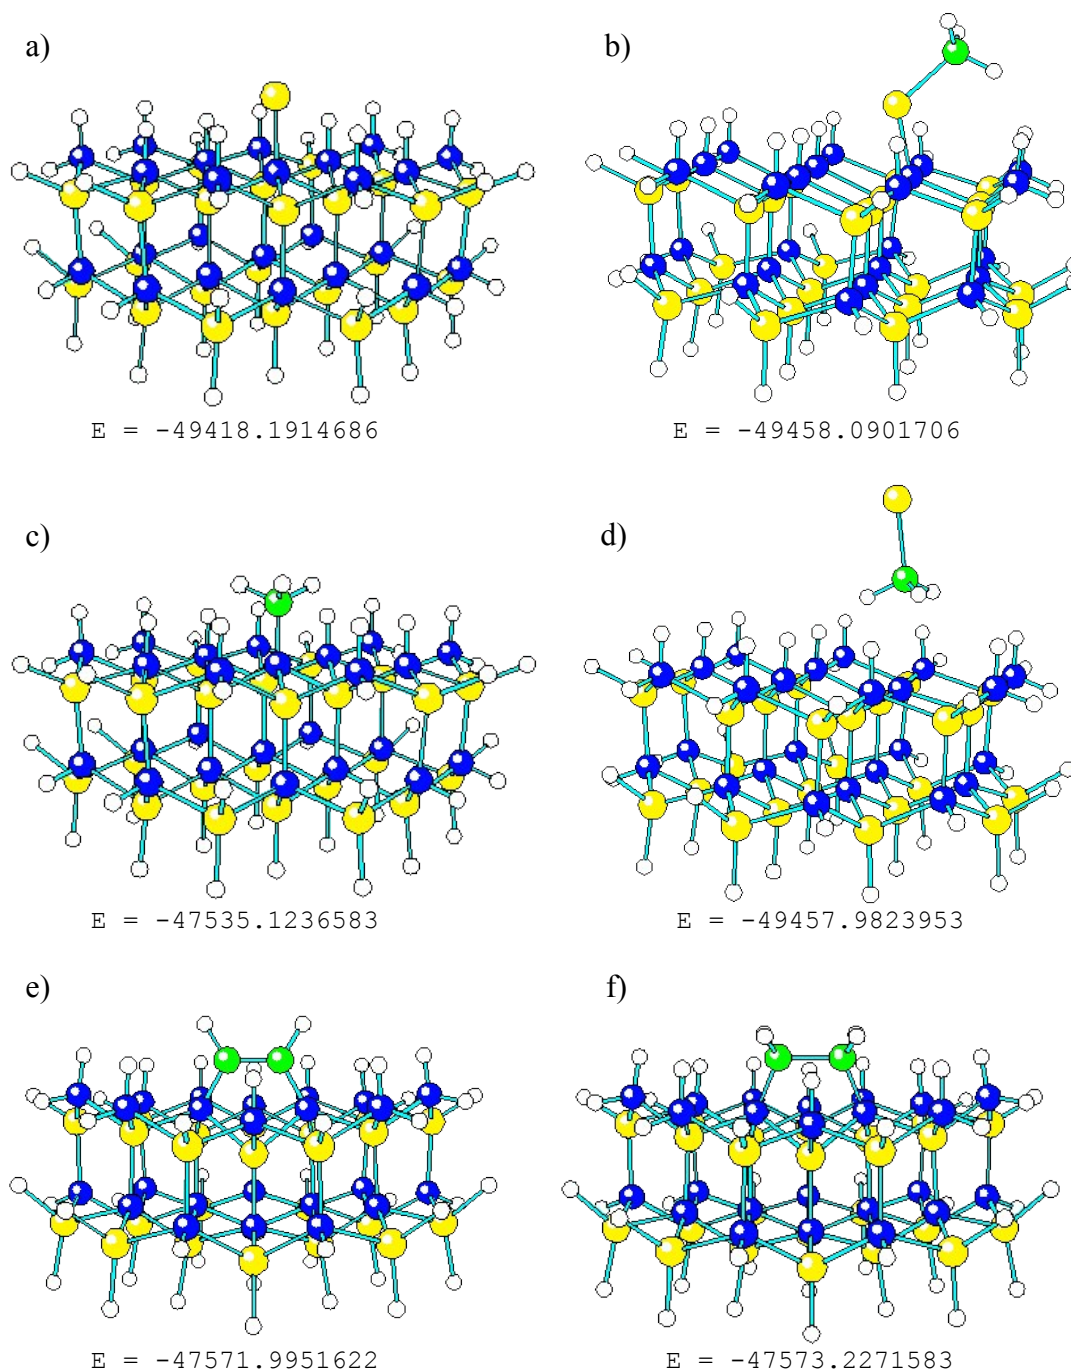

Fig. S1. a) Ga(ads), b) GaCH<sub>3</sub>(ads), c) CH<sub>3</sub>(ads), d) GaCH<sub>3</sub>(ads), physisorbed at the CH<sub>3</sub> part, e) C<sub>2</sub>H<sub>2</sub>(ads), f) C<sub>2</sub>H<sub>4</sub>(ads). The B3LYP/6-31G(d,p) energies (in Hartrees) are given as inserts (the energy of the sole fully H-saturated  $(\text{GaN})_{24}$  cluster is -47495.8123203 Hartree). Yellow: Ga, blue: N, green: C, white: H atoms.

Calculated molefractions of the most abundant species in the gas phase.

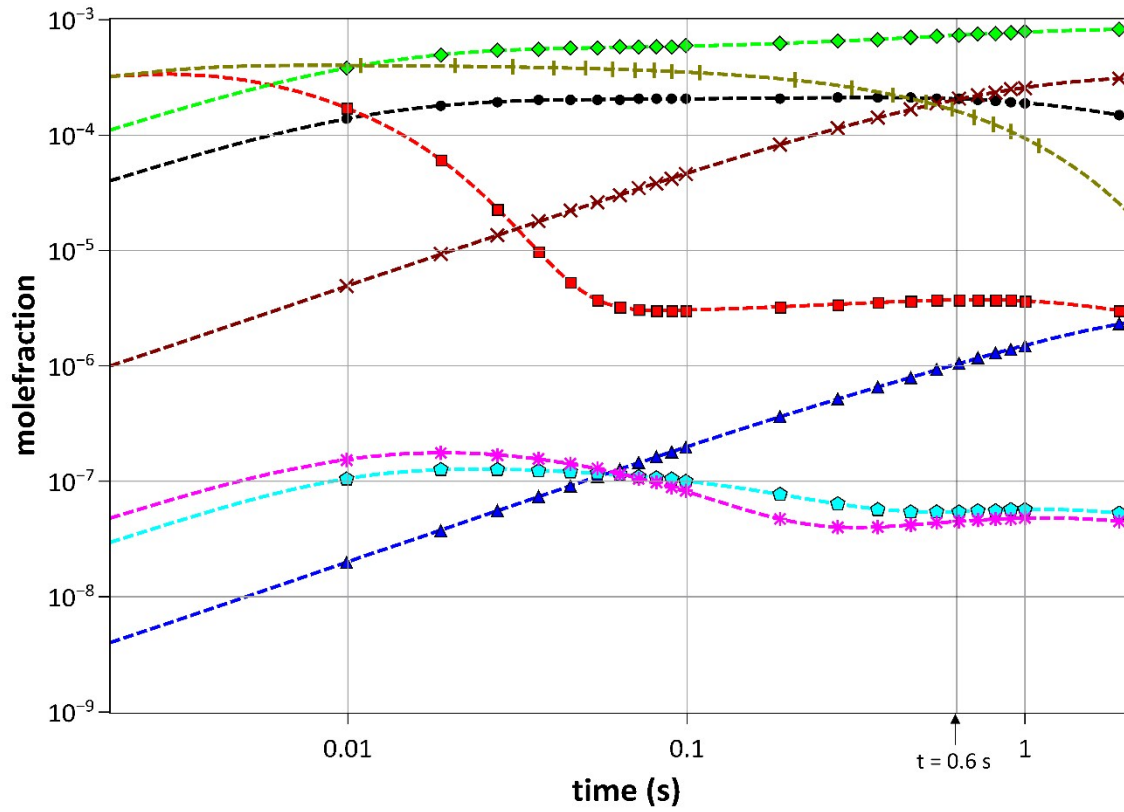

Fig. S2 Calculated molefractions of the most abundant species in the gas phase. ( $H_2$ ,  $N_2$ , and  $NH_3$  are omitted.) Process conditions:  $T = 1050^\circ C$ ,  $NH_3/TMGa = 157$ .  
 $H$  ( $\bullet$ ),  $CH_3$  ( $\blacksquare$ ),  $CH_4$  ( $\blacklozenge$ ),  $C_2H_2$  ( $\blacktriangle$ ),  $C_2H_4$  ( $\triangle$ ),  $C_2H_6$  ( $*$ ),  $Ga$  ( $\times$ ),  $GaCH_3$  ( $\mid$ ).

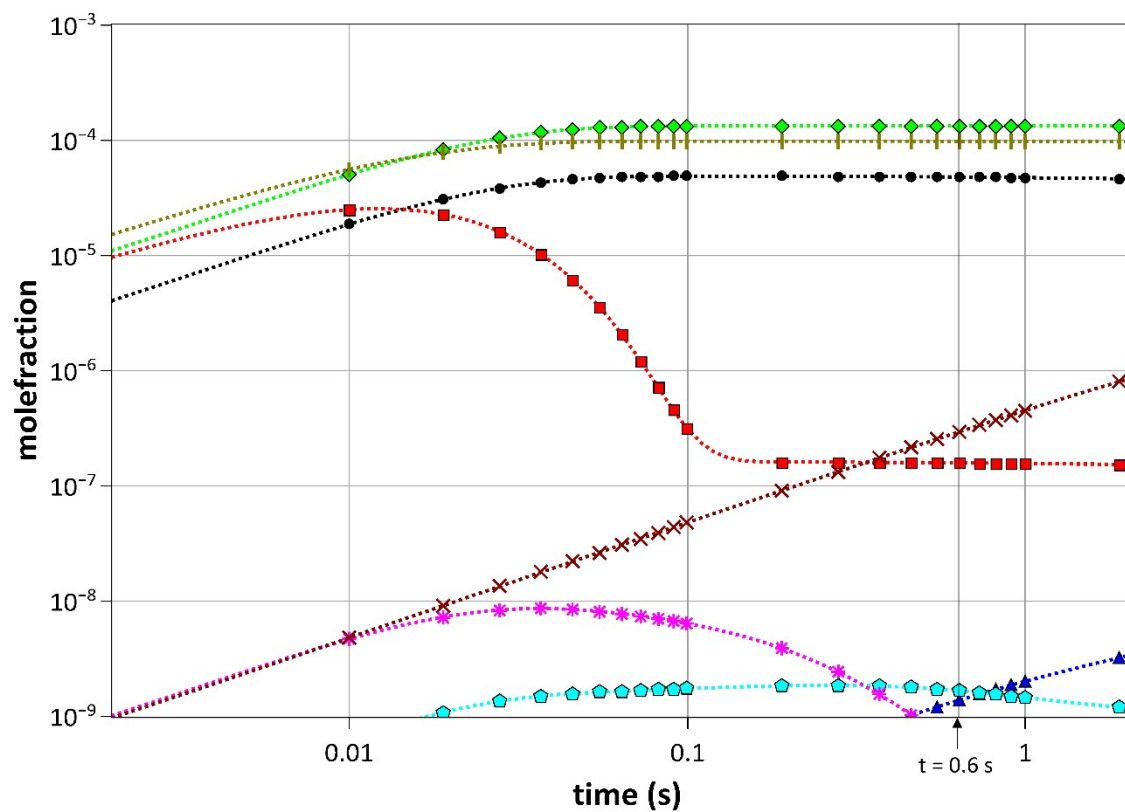

Fig. S3 Calculated molefractions of the most abundant species in the gas phase. ( $H_2$ ,  $N_2$ , and  $NH_3$  are omitted.) Process conditions:  $T = 800^\circ C$ ,  $NH_3/TMGa$  flow = 625.  
 $H$  ( $\bullet$ ),  $CH_3$  ( $\blacksquare$ ),  $CH_4$  ( $\blacklozenge$ ),  $C_2H_2$  ( $\blacktriangle$ ),  $C_2H_4$  ( $\triangle$ ),  $C_2H_6$  ( $*$ ),  $Ga$  ( $\times$ ),  $GaCH_3$  ( $\blacksquare$ ).

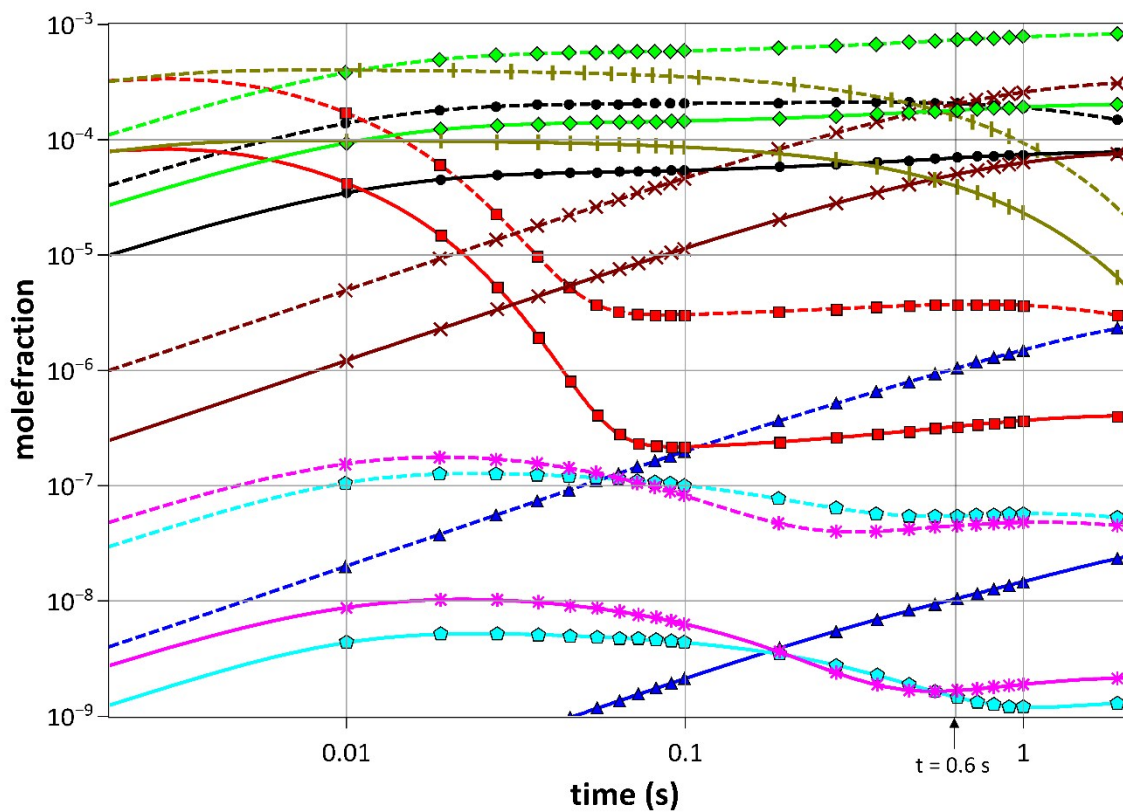

Fig. S4 Calculated molefractions of the most abundant species in the gas phase. ( $\text{H}_2$ ,  $\text{N}_2$ , and  $\text{NH}_3$  are omitted.) Comparing low and high TMGa flow rates at  $T = 1050^\circ\text{C}$ :  $\text{NH}_3/\text{TMGa} = 625$  (solid lines),  $\text{NH}_3/\text{TMGa} = 157$  (dashed lines).  
 $\text{H}$  ( $\bullet$ ),  $\text{CH}_3$  ( $\blacksquare$ ),  $\text{CH}_4$  ( $\blacklozenge$ ),  $\text{C}_2\text{H}_2$  ( $\blacktriangle$ ),  $\text{C}_2\text{H}_4$  ( $\triangle$ ),  $\text{C}_2\text{H}_6$  (\*), Ga ( $\times$ ),  $\text{GaCH}_3$  ( $\mid$ ).

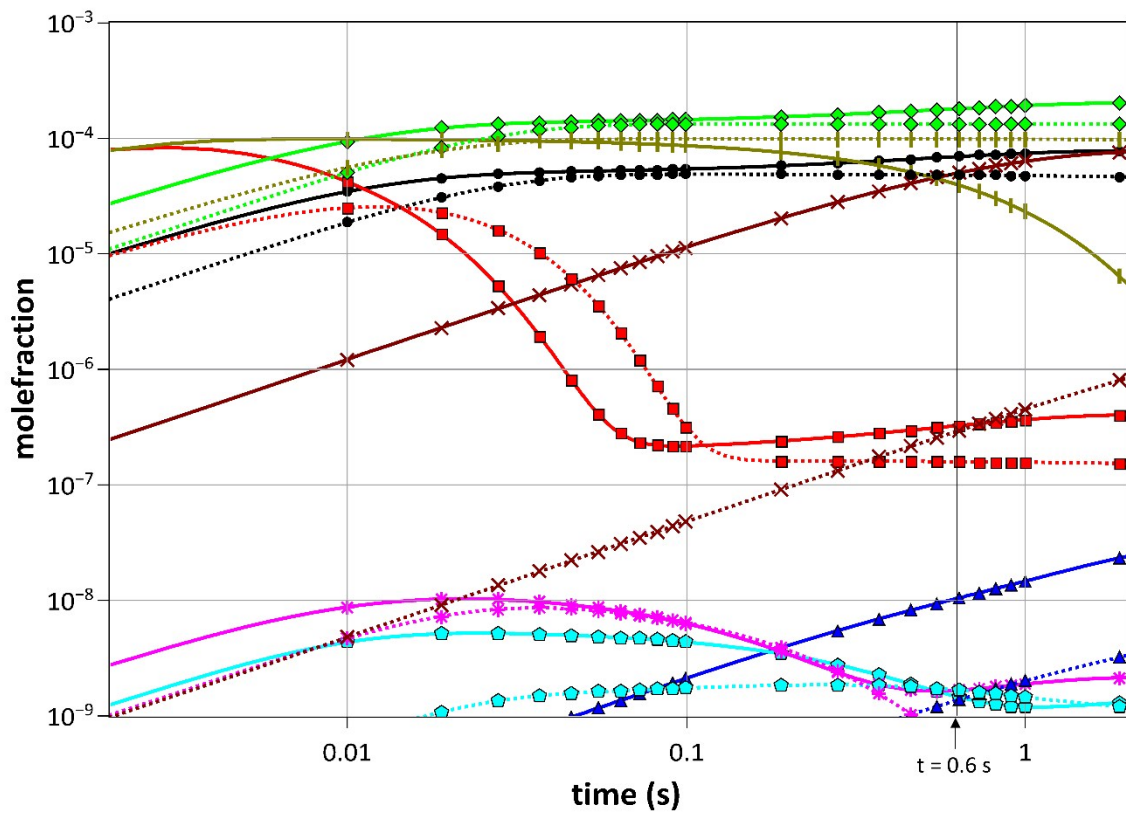

Fig. S5 Calculated molefractions of the most abundant species in the gas phase. ( $\text{H}_2$ ,  $\text{N}_2$ , and  $\text{NH}_3$  are omitted.) Comparing low and high process temperature at  $\text{NH}_3/\text{TMGa} = 625$ :  $T = 1050^\circ\text{C}$  (solid lines),  $T = 800^\circ\text{C}$  (dotted lines).  
 H (●),  $\text{CH}_3$  (■),  $\text{CH}_4$  (◆),  $\text{C}_2\text{H}_2$  (▲),  $\text{C}_2\text{H}_4$  (△),  $\text{C}_2\text{H}_6$  (\*), Ga (×),  $\text{GaCH}_3$  (◻).

## Gas phase reaction schemes.

Table S1 Hydrocarbon reaction scheme. The rate constants are calculated using the modified Arrhenius expression format  $k = AT^n e^{-E_a/RT}$ .

|    | Reaction                                                                                                                        | A (m <sup>3</sup> , mol, s) | n     | Ea/R (K) | Ref. |
|----|---------------------------------------------------------------------------------------------------------------------------------|-----------------------------|-------|----------|------|
| 1  | H <sub>2</sub> + CH ↔ CH <sub>3</sub>                                                                                           | 0.1445·10 <sup>12</sup>     | 0.00  | 1800     | a    |
| 2  | CH + CH ↔ C <sub>2</sub> H + H                                                                                                  | 0.1000·10 <sup>12</sup>     | 0.00  | 0        | b    |
| 3  | CH + CH ↔ C <sub>2</sub> H <sub>2</sub>                                                                                         | 0.1204·10 <sup>12</sup>     | 0.00  | 0        | c    |
| 4  | CH <sub>2</sub> <sup>(1)</sup> ↔ CH + H                                                                                         | 0.3771·10 <sup>16</sup>     | 0.00  | 45000    | d    |
| 5  | CH <sub>2</sub> <sup>(3)</sup> ↔ CH + H                                                                                         | 0.9394·10 <sup>16</sup>     | 0.00  | 45000    | e    |
| 6  | H + CH <sub>2</sub> <sup>(1)</sup> ↔ H + CH <sub>2</sub> <sup>(3)</sup>                                                         | 0.1000·10 <sup>12</sup>     | 0.00  | 0        | f    |
| 7  | H <sub>2</sub> + CH <sub>2</sub> <sup>(1)</sup> ↔ H <sub>2</sub> + CH <sub>2</sub> <sup>(3)</sup>                               | 0.6022·10 <sup>10</sup>     | 0.00  | 0        | e    |
| 8  | CH <sub>2</sub> <sup>(1)</sup> + CH <sub>4</sub> ↔ CH <sub>2</sub> <sup>(3)</sup> + CH <sub>4</sub>                             | 0.1867·10 <sup>10</sup>     | 0.00  | 250      | e    |
| 9  | C <sub>2</sub> H <sub>2</sub> + CH <sub>2</sub> <sup>(1)</sup> ↔ C <sub>2</sub> H <sub>2</sub> + CH <sub>2</sub> <sup>(3)</sup> | 0.6624·10 <sup>13</sup>     | -0.90 | 0        | e    |
| 10 | CH <sub>2</sub> <sup>(1)</sup> + C <sub>2</sub> H <sub>4</sub> ↔ CH <sub>2</sub> <sup>(3)</sup> + C <sub>2</sub> H <sub>4</sub> | 0.1144·10 <sup>11</sup>     | 0.00  | 280      | e    |
| 11 | CH <sub>2</sub> <sup>(1)</sup> + C <sub>2</sub> H <sub>6</sub> ↔ CH <sub>2</sub> <sup>(3)</sup> + C <sub>2</sub> H <sub>6</sub> | 0.2168·10 <sup>11</sup>     | 0.00  | 0        | e    |
| 12 | CH <sub>2</sub> <sup>(1)</sup> + C <sub>3</sub> H <sub>6</sub> ↔ CH <sub>2</sub> <sup>(3)</sup> + C <sub>3</sub> H <sub>6</sub> | 0.3011·10 <sup>11</sup>     | 0.00  | 0        | g    |
| 13 | H + CH <sub>2</sub> <sup>(1)</sup> ↔ H <sub>2</sub> + CH                                                                        | 0.3011·10 <sup>11</sup>     | 0.00  | 0        | h    |
| 14 | H + CH <sub>2</sub> <sup>(3)</sup> ↔ H <sub>2</sub> + CH                                                                        | 0.1204·10 <sup>12</sup>     | 0.00  | 0        | e    |
| 15 | H <sub>2</sub> + CH <sub>2</sub> <sup>(1)</sup> ↔ CH <sub>3</sub> + H                                                           | 0.6022·10 <sup>11</sup>     | 0.00  | 0        | e    |
| 16 | H <sub>2</sub> + CH <sub>2</sub> <sup>(3)</sup> ↔ CH <sub>3</sub> + H                                                           | 0.5012·10 <sup>3</sup>      | 2.00  | 3600     | i    |
| 17 | CH + CH <sub>2</sub> <sup>(1)</sup> ↔ H + C <sub>2</sub> H <sub>2</sub>                                                         | 0.4000·10 <sup>11</sup>     | 0.00  | 0        | j    |
| 18 | CH + CH <sub>2</sub> <sup>(3)</sup> ↔ H + C <sub>2</sub> H <sub>2</sub>                                                         | 0.4000·10 <sup>11</sup>     | 0.00  | 0        | j    |
| 19 | CH <sub>2</sub> <sup>(1)</sup> + CH <sub>2</sub> <sup>(1)</sup> ↔ H <sub>2</sub> + C <sub>2</sub> H <sub>2</sub>                | 0.3011·10 <sup>11</sup>     | 0.00  | 0        | h    |
| 20 | CH <sub>2</sub> <sup>(1)</sup> + CH <sub>2</sub> <sup>(3)</sup> ↔ H <sub>2</sub> + C <sub>2</sub> H <sub>2</sub>                | 0.1807·10 <sup>11</sup>     | 0.00  | 0        | h    |
| 21 | CH <sub>2</sub> <sup>(3)</sup> + CH <sub>2</sub> <sup>(3)</sup> ↔ H <sub>2</sub> + C <sub>2</sub> H <sub>2</sub>                | 0.1204·10 <sup>12</sup>     | 0.00  | 400      | a    |
| 22 | CH <sub>3</sub> + M ↔ H + CH <sub>2</sub> <sup>(1)</sup> + M                                                                    | 0.1024·10 <sup>14</sup>     | 0.00  | 46000    | e    |
| 23 | CH <sub>3</sub> + M ↔ H + CH <sub>2</sub> <sup>(3)</sup> + M                                                                    | 0.1024·10 <sup>14</sup>     | 0.00  | 46000    | e    |
| 24 | H <sub>2</sub> + CH <sub>3</sub> ↔ H + CH <sub>4</sub>                                                                          | 0.1084·10 <sup>1</sup>      | 2.88  | 4100     | e    |
| 25 | CH + CH <sub>3</sub> ↔ H + C <sub>2</sub> H <sub>3</sub>                                                                        | 0.3000·10 <sup>11</sup>     | 0.00  | 0        | j    |
| 26 | CH <sub>3</sub> + CH <sub>2</sub> <sup>(1)</sup> ↔ H + C <sub>2</sub> H <sub>4</sub>                                            | 0.1199·10 <sup>11</sup>     | 0.00  | -290     | i    |
| 27 | CH <sub>3</sub> + CH <sub>2</sub> <sup>(3)</sup> ↔ H + C <sub>2</sub> H <sub>4</sub>                                            | 0.7226·10 <sup>11</sup>     | 0.00  | 0        | e    |
| 28 | CH <sub>3</sub> + CH <sub>3</sub> ↔ H + C <sub>2</sub> H <sub>5</sub>                                                           | 0.5420·10 <sup>11</sup>     | 0.00  | 8100     | e    |
| 29 | CH <sub>3</sub> + CH <sub>3</sub> + M → C <sub>2</sub> H <sub>6</sub> + M                                                       | 0.3613·10 <sup>8</sup>      | 0.00  | 0        | e    |
| 30 | C <sub>2</sub> H <sub>6</sub> + M → 2.0 CH <sub>3</sub> + M                                                                     | 0.4500·10 <sup>19</sup>     | -1.37 | 46000    | e    |
| 31 | CH <sub>4</sub> + M → CH <sub>3</sub> + H + M                                                                                   | 0.2400·10 <sup>14</sup>     | 0.00  | 53000    | k    |
| 32 | CH <sub>3</sub> + H + M → CH <sub>4</sub> + M                                                                                   | 0.2108·10 <sup>9</sup>      | 0.00  | 0        | k    |
| 33 | CH + CH <sub>4</sub> ↔ CH <sub>3</sub> + CH <sub>2</sub> <sup>(1)</sup>                                                         | 0.1325·10 <sup>14</sup>     | -0.94 | 29       | e    |
| 34 | CH + CH <sub>4</sub> ↔ CH <sub>3</sub> + CH <sub>2</sub> <sup>(3)</sup>                                                         | 0.1325·10 <sup>14</sup>     | -0.94 | 29       | e    |
| 35 | CH + CH <sub>4</sub> ↔ H + C <sub>2</sub> H <sub>4</sub>                                                                        | 0.1325·10 <sup>14</sup>     | -0.94 | 29       | e    |
| 36 | CH + CH <sub>4</sub> ↔ C <sub>2</sub> H <sub>5</sub>                                                                            | 0.1626·10 <sup>12</sup>     | 0.00  | 0        | l    |
| 37 | CH <sub>2</sub> <sup>(1)</sup> + CH <sub>4</sub> ↔ 2.0 CH <sub>3</sub>                                                          | 0.9334·10 <sup>10</sup>     | 0.00  | 250      | e    |
| 38 | CH <sub>2</sub> <sup>(3)</sup> + CH <sub>4</sub> ↔ 2.0 CH <sub>3</sub>                                                          | 0.2455·10 <sup>4</sup>      | 2.00  | 4200     | i    |
| 39 | CH <sub>2</sub> <sup>(1)</sup> + CH <sub>4</sub> ↔ H + C <sub>2</sub> H <sub>5</sub>                                            | 0.7467·10 <sup>10</sup>     | 0.00  | 250      | e    |

|    |                                                                                                               |                        |       |       |      |
|----|---------------------------------------------------------------------------------------------------------------|------------------------|-------|-------|------|
| 40 | $\text{CH}_2^{(3)} + \text{CH}_4 \leftrightarrow \text{H} + \text{C}_2\text{H}_5$                             | $0.1964 \cdot 10^4$    | 2.00  | 4200  | est. |
| 41 | $\text{CH}_2^{(1)} + \text{CH}_4 \leftrightarrow \text{C}_2\text{H}_6$                                        | $0.5687 \cdot 10^{10}$ | 0.00  | 0     | est. |
| 42 | $\text{CH}_2^{(3)} + \text{CH}_4 \leftrightarrow \text{C}_2\text{H}_6$                                        | $0.4550 \cdot 10^{10}$ | 0.00  | 0     | est. |
| 43 | $\text{CH}_3 + \text{CH}_4 \leftrightarrow \text{H}_2 + \text{C}_2\text{H}_5$                                 | $0.1024 \cdot 10^{11}$ | 0.00  | 12000 | m    |
| 44 | $\text{H}_2 + \text{C}_2\text{H} \leftrightarrow \text{H} + \text{C}_2\text{H}_2$                             | $0.2108 \cdot 10^4$    | 2.32  | 440   | e    |
| 45 | $\text{C}_2\text{H} + \text{CH}_2^{(1)} \leftrightarrow \text{CH} + \text{C}_2\text{H}_2$                     | $0.1807 \cdot 10^{11}$ | 0.00  | 0     | h    |
| 46 | $\text{C}_2\text{H} + \text{CH}_2^{(3)} \leftrightarrow \text{CH} + \text{C}_2\text{H}_2$                     | $0.1807 \cdot 10^{11}$ | 0.00  | 0     | h    |
| 47 | $\text{CH}_3 + \text{C}_2\text{H} \leftrightarrow \text{H} + \text{C}_3\text{H}_3$                            | $0.2409 \cdot 10^{11}$ | 0.00  | 0     | h    |
| 48 | $\text{C}_2\text{H} + \text{CH}_4 \leftrightarrow \text{CH}_3 + \text{C}_2\text{H}_2$                         | $0.2168 \cdot 10^8$    | 0.94  | 330   | e    |
| 49 | $\text{C}_2\text{H}_2 + \text{M} \leftrightarrow \text{C}_2\text{H} + \text{H} + \text{M}$                    | $0.2630 \cdot 10^{13}$ | 0.00  | 62000 | h    |
| 50 | $\text{H} + \text{C}_2\text{H}_2 + \text{M} \rightarrow \text{C}_2\text{H}_3 + \text{M}$                      | $0.5540 \cdot 10^3$    | 1.64  | 1100  | e    |
| 51 | $\text{C}_2\text{H}_3 + \text{M} \rightarrow \text{H} + \text{C}_2\text{H}_2 + \text{M}$                      | $0.3900 \cdot 10^6$    | 1.62  | 19000 | e    |
| 52 | $\text{H}_2 + \text{C}_2\text{H}_2 \leftrightarrow \text{H} + \text{C}_2\text{H}_3$                           | $0.2409 \cdot 10^{10}$ | 0.00  | 33000 | h    |
| 53 | $\text{CH} + \text{C}_2\text{H}_2 \leftrightarrow \text{H} + \text{C}_3\text{H}_2$                            | $0.1000 \cdot 10^{12}$ | 0.00  | 0     | j    |
| 54 | $\text{C}_2\text{H}_2 + \text{CH}_2^{(1)} \leftrightarrow \text{H} + \text{C}_3\text{H}_3$                    | $0.2698 \cdot 10^{14}$ | -0.90 | 0     | e    |
| 55 | $\text{C}_2\text{H}_2 + \text{CH}_2^{(3)} \leftrightarrow \text{H} + \text{C}_3\text{H}_3$                    | $0.1204 \cdot 10^{11}$ | 0.00  | 3300  | e    |
| 56 | $\text{C}_2\text{H}_2 + \text{CH}_2^{(1)} + \text{M} \leftrightarrow \text{C}_3\text{H}_4\text{A} + \text{M}$ | $0.2698 \cdot 10^{11}$ | -0.90 | 0     | e    |
| 57 | $\text{C}_2\text{H}_2 + \text{CH}_2^{(1)} + \text{M} \leftrightarrow \text{C}_3\text{H}_4\text{P} + \text{M}$ | $0.6745 \cdot 10^{10}$ | -0.90 | 0     | e    |
| 58 | $\text{C}_2\text{H}_2 + \text{CH}_2^{(3)} + \text{M} \leftrightarrow \text{C}_3\text{H}_4\text{A} + \text{M}$ | $0.1204 \cdot 10^8$    | 0.00  | 3300  | e    |
| 59 | $\text{C}_2\text{H}_2 + \text{CH}_2^{(3)} + \text{M} \leftrightarrow \text{C}_3\text{H}_4\text{P} + \text{M}$ | $0.3312 \cdot 10^{10}$ | 0.00  | 4600  | e    |
| 60 | $\text{CH}_3 + \text{C}_2\text{H}_2 \leftrightarrow \text{H} + \text{C}_3\text{H}_4\text{A}$                  | $0.5160 \cdot 10^7$    | 0.86  | 11000 | n    |
| 61 | $\text{CH}_3 + \text{C}_2\text{H}_2 \leftrightarrow \text{H} + \text{C}_3\text{H}_4\text{P}$                  | $0.2561 \cdot 10^7$    | 1.10  | 6900  | n    |
| 62 | $\text{CH}_3 + \text{C}_2\text{H}_2 \leftrightarrow \text{CH}_2\text{CHCH}_2$                                 | $0.1396 \cdot 10^2$    | 2.21  | 8300  | o    |
| 63 | $\text{C}_2\text{H}_2 + \text{C}_2\text{H}_2 \leftrightarrow \text{C}_2\text{H} + \text{C}_2\text{H}_3$       | $0.9635 \cdot 10^{10}$ | 0.00  | 42000 | h    |
| 64 | $\text{H}_2 + \text{C}_2\text{H}_3 \leftrightarrow \text{H} + \text{C}_2\text{H}_4$                           | $0.3016 \cdot 10^2$    | 2.63  | 4300  | h    |
| 65 | $\text{CH} + \text{C}_2\text{H}_3 \leftrightarrow \text{C}_2\text{H}_2 + \text{CH}_2^{(1)}$                   | $0.5000 \cdot 10^{11}$ | 0.00  | 0     | est. |
| 66 | $\text{CH} + \text{C}_2\text{H}_3 \leftrightarrow \text{C}_2\text{H}_2 + \text{CH}_2^{(3)}$                   | $0.5000 \cdot 10^{11}$ | 0.00  | 0     | j    |
| 67 | $\text{CH}_2^{(1)} + \text{C}_2\text{H}_3 \leftrightarrow \text{CH}_3 + \text{C}_2\text{H}_2$                 | $0.1807 \cdot 10^{11}$ | 0.00  | 0     | h    |
| 68 | $\text{CH}_2^{(3)} + \text{C}_2\text{H}_3 \leftrightarrow \text{CH}_3 + \text{C}_2\text{H}_2$                 | $0.1807 \cdot 10^{11}$ | 0.00  | 0     | h    |
| 69 | $\text{CH}_3 + \text{C}_2\text{H}_3 \leftrightarrow \text{C}_2\text{H}_2 + \text{CH}_4$                       | $0.3914 \cdot 10^9$    | 0.00  | 0     | h    |
| 70 | $\text{CH}_3 + \text{C}_2\text{H}_3 \leftrightarrow \text{C}_3\text{H}_6$                                     | $0.1000 \cdot 10^8$    | 1.00  | 0     | p    |
| 71 | $\text{CH}_4 + \text{C}_2\text{H}_3 \leftrightarrow \text{CH}_3 + \text{C}_2\text{H}_4$                       | $0.1451 \cdot 10^{-2}$ | 4.02  | 2800  | h    |
| 72 | $\text{C}_2\text{H}_3 + \text{C}_2\text{H}_3 \leftrightarrow \text{C}_2\text{H}_2 + \text{C}_2\text{H}_4$     | $0.8431 \cdot 10^{11}$ | 0.00  | 0     | e    |
| 73 | $\text{C}_2\text{H}_4 + \text{M} \leftrightarrow \text{H}_2 + \text{C}_2\text{H}_2 + \text{M}$                | $0.7950 \cdot 10^{10}$ | 0.44  | 45000 | h    |
| 74 | $\text{C}_2\text{H}_4 + \text{M} \leftrightarrow \text{H} + \text{C}_2\text{H}_3 + \text{M}$                  | $0.2589 \cdot 10^{15}$ | 0.00  | 49000 | e    |
| 75 | $\text{H} + \text{C}_2\text{H}_4 + \text{M} \leftrightarrow \text{C}_2\text{H}_5 + \text{M}$                  | $0.8414 \cdot 10^3$    | 1.49  | 500   | h    |
| 76 | $\text{H}_2 + \text{C}_2\text{H}_4 \leftrightarrow \text{H} + \text{C}_2\text{H}_5$                           | $0.1018 \cdot 10^{11}$ | 0.00  | 34000 | h    |
| 77 | $\text{CH}_2^{(1)} + \text{C}_2\text{H}_4 \leftrightarrow \text{H} + \text{CH}_2\text{CHCH}_2$                | $0.4529 \cdot 10^{11}$ | 0.00  | -280  | e    |
| 78 | $\text{CH}_2^{(3)} + \text{C}_2\text{H}_4 \leftrightarrow \text{H} + \text{CH}_2\text{CHCH}_2$                | $0.3192 \cdot 10^{11}$ | 0.00  | 2700  | e    |
| 79 | $\text{CH}_2^{(1)} + \text{C}_2\text{H}_4 + \text{M} \leftrightarrow \text{C}_3\text{H}_6 + \text{M}$         | $0.5661 \cdot 10^8$    | 0.00  | -280  | e    |
| 80 | $\text{CH}_2^{(3)} + \text{C}_2\text{H}_4 + \text{M} \leftrightarrow \text{C}_3\text{H}_6 + \text{M}$         | $0.3192 \cdot 10^8$    | 0.00  | 2700  | e    |
| 81 | $\text{CH}_3 + \text{C}_2\text{H}_4 \leftrightarrow \text{i-C}_3\text{H}_7$                                   | $0.4600 \cdot 10^2$    | 1.00  | 2200  | p    |
| 82 | $\text{CH}_3 + \text{C}_2\text{H}_4 \leftrightarrow \text{n-C}_3\text{H}_7$                                   | $0.2200 \cdot 10^6$    | 1.00  | 2900  | p    |
| 83 | $\text{C}_2\text{H}_4 + \text{C}_2\text{H}_4 \leftrightarrow \text{C}_2\text{H}_3 + \text{C}_2\text{H}_5$     | $0.4818 \cdot 10^{12}$ | 0.00  | 36000 | h    |
| 84 | $\text{H} + \text{C}_2\text{H}_5 \leftrightarrow \text{C}_2\text{H}_6$                                        | $0.5440 \cdot 10^{11}$ | 0.16  | 0     | q    |

|     |                                                           |                        |       |       |      |
|-----|-----------------------------------------------------------|------------------------|-------|-------|------|
| 85  | $H_2 + C_2H_5 \leftrightarrow H + C_2H_6$                 | $0.3071 \cdot 10^{-2}$ | 3.60  | 4200  | e    |
| 86  | $CH_2^{(1)} + C_2H_5 \leftrightarrow CH_3 + C_2H_4$       | $0.9033 \cdot 10^{10}$ | 0.00  | 0     | h    |
| 87  | $CH_2^{(3)} + C_2H_5 \leftrightarrow CH_3 + C_2H_4$       | $0.1807 \cdot 10^{11}$ | 0.00  | 0     | h    |
| 88  | $CH_2^{(1)} + C_2H_5 \leftrightarrow H + C_3H_6$          | $0.9033 \cdot 10^{10}$ | 0.00  | 0     | h    |
| 89  | $CH_2^{(3)} + C_2H_5 \leftrightarrow H + C_3H_6$          | $0.1807 \cdot 10^{11}$ | 0.00  | 0     | est. |
| 90  | $CH_3 + C_2H_5 \leftrightarrow CH_4 + C_2H_4$             | $0.9033 \cdot 10^9$    | 0.00  | 0     | e    |
| 91  | $CH_4 + C_2H_5 \leftrightarrow CH_3 + C_2H_6$             | $0.8618 \cdot 10^{-4}$ | 4.14  | 6300  | h    |
| 92  | $C_2H + C_2H_5 \leftrightarrow C_2H_2 + C_2H_4$           | $0.1807 \cdot 10^{10}$ | 0.00  | 0     | h    |
| 93  | $C_2H + C_2H_5 \leftrightarrow CH_3 + C_3H_3$             | $0.1813 \cdot 10^{11}$ | 0.00  | 0     | h    |
| 94  | $C_2H_2 + C_2H_5 \leftrightarrow C_2H + C_2H_6$           | $0.2710 \cdot 10^9$    | 0.00  | 12000 | h    |
| 95  | $C_2H_3 + C_2H_5 \leftrightarrow C_2H_2 + C_2H_6$         | $0.4818 \cdot 10^9$    | 0.00  | 0     | h    |
| 96  | $C_2H_4 + C_2H_5 \leftrightarrow C_2H_6 + C_2H_3$         | $0.4878 \cdot 10^{-9}$ | 5.82  | 6000  | e    |
| 97  | $C_2H_5 + C_2H_5 \leftrightarrow C_2H_4 + C_2H_6$         | $0.1385 \cdot 10^{10}$ | 0.00  | 0     | e    |
| 98  | $CH_2^{(1)} + C_2H_6 \leftrightarrow CH_3 + C_2H_5$       | $0.3981 \cdot 10^{11}$ | 0.00  | -280  | i    |
| 99  | $CH_2^{(3)} + C_2H_6 \leftrightarrow CH_3 + C_2H_5$       | $0.1807 \cdot 10^3$    | 0.00  | 0     | h    |
| 100 | $H + C_3H_2 \leftrightarrow C_3H_3$                       | $0.7600 \cdot 10^{11}$ | 0.22  | -44   | r    |
| 101 | $CH_2^{(1)} + C_3H_2 \leftrightarrow 2.0 C_2H_2$          | $0.1995 \cdot 10^{10}$ | 0.00  | 0     | est. |
| 102 | $CH_2^{(3)} + C_3H_2 \leftrightarrow 2.0 C_2H_2$          | $0.1995 \cdot 10^{10}$ | 0.00  | 0     | f    |
| 103 | $H + C_3H_3 \leftrightarrow CH + C_2H_3$                  | $0.4348 \cdot 10^{11}$ | 0.00  | 0     | s    |
| 104 | $H + C_3H_3 \leftrightarrow H_2 + C_3H_2$                 | $0.1000 \cdot 10^{11}$ | 0.00  | 0     | f    |
| 105 | $H + C_3H_3 \leftrightarrow C_3H_4A$                      | $0.2002 \cdot 10^{11}$ | 0.21  | -87   | r    |
| 106 | $H + C_3H_3 \leftrightarrow C_3H_4P$                      | $0.6473 \cdot 10^{11}$ | 0.10  | -16   | r    |
| 107 | $C_3H_4P \leftrightarrow C_3H_4A$                         | $0.1700 \cdot 10^{15}$ | 0.00  | 34000 | t    |
| 108 | $H + C_3H_4A \leftrightarrow H_2 + C_3H_3$                | $0.5012 \cdot 10^4$    | 2.00  | 3000  | f    |
| 109 | $H + C_3H_4P \leftrightarrow H_2 + C_3H_3$                | $0.1995 \cdot 10^{12}$ | 2.00  | 7600  | f    |
| 110 | $H + C_3H_4A \leftrightarrow H + C_3H_4P$                 | $0.2512 \cdot 10^{11}$ | 0.00  | 0     | f    |
| 111 | $H + C_3H_4A \leftrightarrow CH_2CHCH_2$                  | $0.4000 \cdot 10^{10}$ | 0.00  | 1400  | u    |
| 112 | $H + C_3H_4P \leftrightarrow CH_2CHCH_2$                  | $0.1999 \cdot 10^{11}$ | 0.00  | 1200  | v    |
| 113 | $CH_3 + C_3H_4A \leftrightarrow CH_4 + C_3H_3$            | $0.6607 \cdot 10^{-6}$ | 5.00  | 4200  | f    |
| 114 | $CH_3 + C_3H_4P \leftrightarrow CH_4 + C_3H_3$            | $0.2188 \cdot 10^{-6}$ | 5.00  | 4200  | f    |
| 115 | $C_2H + C_3H_4P \leftrightarrow C_2H_2 + C_3H_3$          | $0.9997 \cdot 10^{10}$ | 0.00  | 0     | u    |
| 116 | $H + CH_2CHCH_2 \leftrightarrow CH_3 + C_2H_3$            | $0.1807 \cdot 10^{11}$ | 0.00  | 0     | e    |
| 117 | $H + CH_2CHCH_2 \leftrightarrow H_2 + C_3H_4A$            | $0.1807 \cdot 10^{11}$ | 0.00  | 0     | e    |
| 118 | $H + CH_2CHCH_2 \leftrightarrow H_2 + C_3H_4P$            | $0.1807 \cdot 10^{11}$ | 0.00  | 0     | est. |
| 119 | $H + CH_2CHCH_2 \leftrightarrow C_3H_6$                   | $0.5701 \cdot 10^{11}$ | 0.18  | -63   | r    |
| 120 | $H_2 + CH_2CHCH_2 \leftrightarrow H + C_3H_6$             | $0.1084 \cdot 10^3$    | 2.40  | 9600  | e    |
| 121 | $CH_2^{(1)} + CH_2CHCH_2 \leftrightarrow C_2H_4 + C_2H_3$ | $0.4818 \cdot 10^{11}$ | 0.00  | 0     | g    |
| 122 | $CH_2^{(3)} + CH_2CHCH_2 \leftrightarrow C_2H_4 + C_2H_3$ | $0.7528 \cdot 10^{10}$ | 0.00  | 0     | g    |
| 123 | $CH_3 + CH_2CHCH_2 \leftrightarrow CH_4 + C_3H_4A$        | $0.3009 \cdot 10^{10}$ | -0.32 | -66   | g    |
| 124 | $CH_3 + CH_2CHCH_2 \leftrightarrow CH_4 + C_3H_4P$        | $0.3613 \cdot 10^9$    | 0.00  | 0     | e    |
| 125 | $CH_4 + CH_2CHCH_2 \leftrightarrow CH_3 + C_3H_6$         | $0.3975 \cdot 10^{-1}$ | 3.40  | 12000 | e    |
| 126 | $C_2H + CH_2CHCH_2 \leftrightarrow C_2H_3 + C_3H_3$       | $0.1204 \cdot 10^{23}$ | 0.00  | 0     | g    |
| 127 | $C_2H + CH_2CHCH_2 \leftrightarrow C_2H_2 + C_3H_4A$      | $0.9033 \cdot 10^{20}$ | 0.00  | 0     | g    |
| 128 | $C_2H_3 + CH_2CHCH_2 \leftrightarrow C_2H_4 + C_3H_4A$    | $0.2409 \cdot 10^{10}$ | 0.00  | 0     | g    |
| 129 | $C_2H_3 + CH_2CHCH_2 \leftrightarrow C_2H_2 + C_3H_6$     | $0.4818 \cdot 10^{10}$ | 0.00  | 0     | g    |



|     |                                                            |                        |       |       |      |
|-----|------------------------------------------------------------|------------------------|-------|-------|------|
| 130 | $C_2H_4 + CH_2CHCH_2 \leftrightarrow C_3H_6 + C_2H_3$      | $0.3975 \cdot 10^{-1}$ | 3.40  | 13000 | e    |
| 131 | $C_2H_5 + CH_2CHCH_2 \leftrightarrow C_2H_6 + C_3H_4A$     | $0.9635 \cdot 10^9$    | 0.00  | -66   | e    |
| 132 | $C_2H_5 + CH_2CHCH_2 \leftrightarrow C_2H_4 + C_3H_6$      | $0.2589 \cdot 10^{10}$ | 0.00  | -66   | e    |
| 133 | $C_2H_6 + CH_2CHCH_2 \leftrightarrow C_3H_6 + C_2H_5$      | $0.2349 \cdot 10^0$    | 3.30  | 10000 | e    |
| 134 | $CH_2CHCH_2 + CH_2CHCH_2 \leftrightarrow C_3H_6 + C_3H_4A$ | $0.6022 \cdot 10^8$    | 0.00  | 0     | e    |
| 135 | $H + C_3H_6 \leftrightarrow i-C_3H_7$                      | $0.1319 \cdot 10^{11}$ | 0.00  | 780   | g    |
| 136 | $H + C_3H_6 \leftrightarrow n-C_3H_7$                      | $0.1319 \cdot 10^{11}$ | 0.00  | 1600  | g    |
| 137 | $CH_2^{(1)} + C_3H_6 \leftrightarrow CH_3 + CH_2CHCH_2$    | $0.5239 \cdot 10^{11}$ | 0.00  | 0     | g    |
| 138 | $CH_2^{(3)} + C_3H_6 \leftrightarrow CH_3 + CH_2CHCH_2$    | $0.7226 \cdot 10^9$    | 0.00  | 3100  | g    |
| 139 | $C_2H + C_3H_6 \leftrightarrow C_2H_3 + C_3H_4P$           | $0.1210 \cdot 10^{11}$ | 0.00  | 0     | g    |
| 140 | $C_2H + C_3H_6 \leftrightarrow C_2H_2 + CH_2CHCH_2$        | $0.3607 \cdot 10^{10}$ | 0.00  | 0     | g    |
| 141 | $C_2H_4 + C_3H_6 \leftrightarrow C_2H_3 + i-C_3H_7$        | $0.7226 \cdot 10^{13}$ | -0.65 | 37000 | g    |
| 142 | $C_2H_4 + C_3H_6 \leftrightarrow C_2H_3 + n-C_3H_7$        | $0.6022 \cdot 10^{11}$ | 0.00  | 38000 | g    |
| 143 | $H + i-C_3H_7 \leftrightarrow H_2 + C_3H_6$                | $0.3613 \cdot 10^{10}$ | 0.00  | 0     | w    |
| 144 | $H + n-C_3H_7 \leftrightarrow H_2 + C_3H_6$                | $0.1813 \cdot 10^{10}$ | 0.00  | 0     | w    |
| 145 | $CH_2^{(1)} + i-C_3H_7 \leftrightarrow C_2H_4 + C_2H_5$    | $0.3115 \cdot 10^{11}$ | 0.00  | 0     | est. |
| 146 | $CH_2^{(1)} + n-C_3H_7 \leftrightarrow C_2H_4 + C_2H_5$    | $0.2710 \cdot 10^{11}$ | 0.00  | 0     | w    |
| 147 | $CH_2^{(3)} + i-C_3H_7 \leftrightarrow C_2H_4 + C_2H_5$    | $0.3011 \cdot 10^{12}$ | 0.00  | 0     | est. |
| 148 | $CH_2^{(3)} + n-C_3H_7 \leftrightarrow C_2H_4 + C_2H_5$    | $0.1807 \cdot 10^{11}$ | 0.00  | 0     | w    |
| 149 | $CH_2^{(1)} + i-C_3H_7 \leftrightarrow CH_3 + C_3H_6$      | $0.1038 \cdot 10^{11}$ | 0.00  | 0     | w    |
| 150 | $CH_2^{(1)} + n-C_3H_7 \leftrightarrow CH_3 + C_3H_6$      | $0.9033 \cdot 10^{10}$ | 0.00  | 0     | w    |
| 151 | $CH_2^{(3)} + i-C_3H_7 \leftrightarrow CH_3 + C_3H_6$      | $0.3011 \cdot 10^{11}$ | 0.00  | 0     | w    |
| 152 | $CH_2^{(3)} + n-C_3H_7 \leftrightarrow CH_3 + C_3H_6$      | $0.1807 \cdot 10^{10}$ | 0.00  | 0     | w    |
| 153 | $CH_3 + i-C_3H_7 \leftrightarrow CH_4 + C_3H_6$            | $0.9408 \cdot 10^8$    | 0.68  | 0     | w    |
| 154 | $CH_3 + n-C_3H_7 \leftrightarrow CH_4 + C_3H_6$            | $0.1145 \cdot 10^{11}$ | -0.32 | 0     | w    |
| 155 | $C_2H + i-C_3H_7 \leftrightarrow C_2H_5 + C_3H_3$          | $0.7250 \cdot 10^{10}$ | 0.00  | 0     | est. |
| 156 | $C_2H + n-C_3H_7 \leftrightarrow C_2H_5 + C_3H_3$          | $0.1210 \cdot 10^{11}$ | 0.00  | 0     | w    |
| 157 | $C_2H + i-C_3H_7 \leftrightarrow C_2H_2 + C_3H_6$          | $0.3607 \cdot 10^{10}$ | 0.00  | 0     | w    |
| 158 | $C_2H + n-C_3H_7 \leftrightarrow C_2H_2 + C_3H_6$          | $0.6022 \cdot 10^{10}$ | 0.00  | 0     | w    |
| 159 | $C_2H_3 + i-C_3H_7 \leftrightarrow C_2H_2 + C_3H_8$        | $0.1520 \cdot 10^{12}$ | -0.70 | 0     | w    |
| 160 | $C_2H_3 + n-C_3H_7 \leftrightarrow C_2H_2 + C_3H_8$        | $0.1210 \cdot 10^{10}$ | 0.00  | 0     | w    |
| 161 | $C_2H_4 + i-C_3H_7 \leftrightarrow C_3H_6 + C_2H_5$        | $0.2650 \cdot 10^8$    | 0.00  | 3300  | w    |
| 162 | $C_2H_4 + n-C_3H_7 \leftrightarrow C_3H_6 + C_2H_5$        | $0.2650 \cdot 10^7$    | 0.00  | 3300  | est. |
| 163 | $C_2H_5 + i-C_3H_7 \leftrightarrow C_2H_6 + C_3H_6$        | $0.2300 \cdot 10^{11}$ | -0.35 | 0     | w    |
| 164 | $C_2H_5 + n-C_3H_7 \leftrightarrow C_2H_6 + C_3H_6$        | $0.1451 \cdot 10^{10}$ | 0.00  | 0     | w    |
| 165 | $C_2H_5 + i-C_3H_7 \leftrightarrow C_2H_4 + C_3H_8$        | $0.1844 \cdot 10^{11}$ | -0.35 | 0     | w    |
| 166 | $C_2H_5 + n-C_3H_7 \leftrightarrow C_2H_4 + C_3H_8$        | $0.1150 \cdot 10^{10}$ | 0.00  | 0     | w    |
| 167 | $CH_2CHCH_2 + i-C_3H_7 \leftrightarrow 2.0 C_3H_6$         | $0.2291 \cdot 10^{11}$ | -0.35 | -66   | g    |
| 168 | $CH_2CHCH_2 + n-C_3H_7 \leftrightarrow 2.0 C_3H_6$         | $0.1451 \cdot 10^{10}$ | 0.00  | -66   | g    |
| 169 | $CH_2CHCH_2 + i-C_3H_7 \leftrightarrow C_3H_4A + C_3H_8$   | $0.4600 \cdot 10^{10}$ | -0.35 | -66   | g    |
| 170 | $CH_2CHCH_2 + n-C_3H_7 \leftrightarrow C_3H_4A + C_3H_8$   | $0.7226 \cdot 10^9$    | 0.00  | -66   | g    |
| 171 | $i-C_3H_7 + i-C_3H_7 \leftrightarrow C_3H_6 + C_3H_8$      | $0.2529 \cdot 10^{10}$ | 0.00  | 0     | e    |
| 172 | $i-C_3H_7 + n-C_3H_7 \leftrightarrow C_3H_6 + C_3H_8$      | $0.1602 \cdot 10^{10}$ | 0.00  | 0     | v    |
| 173 | $n-C_3H_7 + n-C_3H_7 \leftrightarrow C_3H_6 + C_3H_8$      | $0.1692 \cdot 10^{10}$ | 0.00  | 0     | w    |
| 174 | $C_3H_8 \leftrightarrow CH_3 + C_2H_5$                     | $0.1100 \cdot 10^{18}$ | 0.00  | 42000 | a    |

|     |                                                              |                        |       |       |      |
|-----|--------------------------------------------------------------|------------------------|-------|-------|------|
| 175 | $C_3H_8 \leftrightarrow H + i-C_3H_7$                        | $0.7200 \cdot 10^{15}$ | -0.03 | 48000 | p    |
| 176 | $C_3H_8 \leftrightarrow H + n-C_3H_7$                        | $0.7600 \cdot 10^{16}$ | -0.34 | 50000 | p    |
| 177 | $H + C_3H_8 \leftrightarrow H_2 + i-C_3H_7$                  | $0.8700 \cdot 10^4$    | 2.00  | 2300  | p    |
| 178 | $H + C_3H_8 \leftrightarrow H_2 + n-C_3H_7$                  | $0.5600 \cdot 10^5$    | 2.00  | 3900  | p    |
| 179 | $CH_2^{(1)} + C_3H_8 \leftrightarrow CH_3 + i-C_3H_7$        | $0.4276 \cdot 10^{11}$ | 0.00  | 0     | w    |
| 180 | $CH_2^{(3)} + C_3H_8 \leftrightarrow CH_3 + i-C_3H_7$        | $0.1506 \cdot 10^{-2}$ | 3.46  | 3800  | w    |
| 181 | $CH_2^{(1)} + C_3H_8 \leftrightarrow CH_3 + n-C_3H_7$        | $0.1000 \cdot 10^{12}$ | 0.00  | 0     | est. |
| 182 | $CH_2^{(3)} + C_3H_8 \leftrightarrow CH_3 + n-C_3H_7$        | $0.9033 \cdot 10^{-3}$ | 3.65  | 3600  | w    |
| 183 | $CH_3 + C_3H_8 \leftrightarrow CH_4 + i-C_3H_7$              | $0.1097 \cdot 10^{13}$ | 0.00  | 13000 | j    |
| 184 | $CH_3 + C_3H_8 \leftrightarrow CH_4 + n-C_3H_7$              | $0.1097 \cdot 10^{13}$ | 0.00  | 13000 | j    |
| 185 | $C_2H + C_3H_8 \leftrightarrow C_2H_2 + i-C_3H_7$            | $0.1210 \cdot 10^{10}$ | 0.00  | 0     | w    |
| 186 | $C_2H + C_3H_8 \leftrightarrow C_2H_2 + n-C_3H_7$            | $0.3607 \cdot 10^{10}$ | 0.00  | 0     | w    |
| 187 | $C_2H_3 + C_3H_8 \leftrightarrow C_2H_4 + i-C_3H_7$          | $0.1000 \cdot 10^9$    | 0.00  | 5200  | j    |
| 188 | $C_2H_3 + C_3H_8 \leftrightarrow C_2H_4 + n-C_3H_7$          | $0.1000 \cdot 10^9$    | 0.00  | 5200  | j    |
| 189 | $C_2H_5 + C_3H_8 \leftrightarrow C_2H_6 + i-C_3H_7$          | $0.1000 \cdot 10^9$    | 0.00  | 5200  | j    |
| 190 | $C_2H_5 + C_3H_8 \leftrightarrow C_2H_6 + n-C_3H_7$          | $0.1000 \cdot 10^9$    | 0.00  | 5200  | j    |
| 191 | $CH_2CHCH_2 + C_3H_8 \leftrightarrow C_3H_6 + i-C_3H_7$      | $0.7829 \cdot 10^{-1}$ | 3.30  | 8700  | e    |
| 192 | $CH_2CHCH_2 + C_3H_8 \leftrightarrow C_3H_6$                 | $0.2349 \cdot 10^0$    | 3.30  | 10000 | e    |
| 193 | $i-C_3H_7 + C_3H_8 \leftrightarrow n-C_3H_7 + C_3H_8$        | $0.8430 \cdot 10^{-5}$ | 4.20  | 4400  | w    |
| 194 | $H_2 + 2 H \leftrightarrow 2 H_2$                            | $0.9791 \cdot 10^{11}$ | -0.60 | 0     | a    |
| 195 | $C_3H_6 \leftrightarrow C_2H_2 + CH_4$                       | $0.3500 \cdot 10^{13}$ | 0.00  | 35000 | x    |
| 196 | $i-C_4H_{10} \leftrightarrow CH_3 + i-C_3H_7$                | $0.2000 \cdot 10^{27}$ | -3.50 | 40000 | y    |
| 197 | $H + i-C_4H_{10} \leftrightarrow H_2 + i-C_4H_9$             | $0.3480 \cdot 10^{10}$ | 2.54  | 3400  | y    |
| 198 | $CH_3 + i-C_4H_{10} \leftrightarrow CH_4 + i-C_4H_9$         | $0.1460 \cdot 10^7$    | 3.65  | 3600  | y    |
| 199 | $C_2H + i-C_4H_{10} \leftrightarrow C_2H_2 + i-C_4H_9$       | $0.6020 \cdot 10^{10}$ | 0.00  | 0     | y    |
| 200 | $C_2H_3 + i-C_4H_{10} \leftrightarrow C_2H_4 + i-C_4H_9$     | $0.1460 \cdot 10^7$    | 3.65  | 2600  | y    |
| 201 | $C_2H_5 + i-C_4H_{10} \leftrightarrow C_2H_6 + i-C_4H_9$     | $0.1490 \cdot 10^7$    | 3.65  | 4600  | y    |
| 202 | $i-C_3H_7 + i-C_4H_{10} \leftrightarrow C_3H_8 + i-C_4H_9$   | $0.3120 \cdot 10^6$    | 4.20  | 4400  | y    |
| 203 | $n-C_3H_7 + i-C_4H_{10} \leftrightarrow C_3H_8 + i-C_4H_9$   | $0.1490 \cdot 10^7$    | 3.65  | 4600  | y    |
| 204 | $i-C_4H_9 + i-C_4H_9 \leftrightarrow i-C_4H_{10} + i-C_4H_8$ | $0.7380 \cdot 10^9$    | 0.00  | 0     | y    |
| 205 | $i-C_4H_9 \leftrightarrow CH_3 + C_3H_6$                     | $0.2000 \cdot 10^{14}$ | 0.00  | 15000 | y    |
| 206 | $C_2H_2 + i-C_4H_9 \leftrightarrow C_3H_6 + CH_2CHCH_2$      | $0.7230 \cdot 10^9$    | 0.00  | 4500  | y    |
| 207 | $CH_2 + i-C_4H_9 \leftrightarrow C_2H_4 + i-C_3H_7$          | $0.1810 \cdot 10^{11}$ | 0.00  | 0     | y    |
| 208 | $C_2H_4 + i-C_4H_9 \leftrightarrow C_3H_6 + i-C_3H_7$        | $0.3010 \cdot 10^8$    | 0.00  | 3100  | y    |
| 209 | $H + i-C_4H_9 \leftrightarrow H_2 + i-C_4H_8$                | $0.9030 \cdot 10^9$    | 0.00  | 0     | y    |
| 210 | $CH_3 + i-C_4H_9 \leftrightarrow CH_4 + i-C_4H_8$            | $0.9760 \cdot 10^9$    | -0.32 | 0     | y    |
| 211 | $C_2H + i-C_4H_9 \leftrightarrow C_2H_2 + i-C_4H_8$          | $0.6020 \cdot 10^{10}$ | 0.00  | 0     | y    |
| 212 | $C_2H_3 + i-C_4H_9 \leftrightarrow C_2H_4 + i-C_4H_8$        | $0.8430 \cdot 10^9$    | 0.00  | 0     | y    |
| 213 | $C_2H_5 + i-C_4H_9 \leftrightarrow C_2H_6 + i-C_4H_8$        | $0.8430 \cdot 10^9$    | 0.00  | 0     | y    |
| 214 | $i-C_3H_7 + i-C_4H_9 \leftrightarrow C_3H_8 + i-C_4H_8$      | $0.3490 \cdot 10^{10}$ | 0.35  | 0     | y    |
| 215 | $n-C_3H_7 + i-C_4H_9 \leftrightarrow C_3H_8 + i-C_4H_8$      | $0.7230 \cdot 10^9$    | 0.00  | 0     | y    |
| 216 | $C_2H_3 + i-C_4H_9 \leftrightarrow C_2H_2 + i-C_4H_{10}$     | $0.8430 \cdot 10^9$    | 0.00  | 0     | y    |
| 217 | $C_2H_5 + i-C_4H_9 \leftrightarrow C_2H_4 + i-C_4H_{10}$     | $0.8430 \cdot 10^9$    | 0.00  | 0     | y    |
| 218 | $i-C_3H_7 + i-C_4H_9 \leftrightarrow C_3H_6 + i-C_4H_{10}$   | $0.1930 \cdot 10^{10}$ | -0.35 | 0     | y    |
| 219 | $n-C_3H_7 + i-C_4H_9 \leftrightarrow C_3H_6 + i-C_4H_{10}$   | $0.1450 \cdot 10^{10}$ | 0.00  | 0     | y    |

|     |                                                                                        |                        |      |      |   |
|-----|----------------------------------------------------------------------------------------|------------------------|------|------|---|
| 220 | $\text{H} + \text{i-C}_4\text{H}_8 \leftrightarrow \text{CH}_3 + \text{C}_3\text{H}_6$ | $0.1720 \cdot 10^{11}$ | 0.00 | 1800 | z |
|-----|----------------------------------------------------------------------------------------|------------------------|------|------|---|

References:

- a. D. L. Baulch et al, *J. Phys. Chem. Ref. Data*, 1994, **23**, 847
- b. A. Bergeat et al, *J. Phys. Chem. A.*, 1999, **103**, 6360
- c. J-C. LeGrand et al, *Vacuum*, 1998, **50**, 491
- d. S. Bauerle et al, *Ber. Bunsenges. Phys. Chem.*, 1995, **99**, 870
- e. D. L. Baulch et al, *J. Phys. Chem. Ref. Data*, 2005, **34**, 757
- f. J. H. Kiefer et al, *J. Phys. Chem. A.*, 1997, **101**, 4057
- g. W. Tsang, *J. Phys. Chem. Ref. Data*, 1991, **20**, 221
- h. W. Tsang and R. F. Hampson, *J. Phys. Chem. Ref. Data*, 1986, **15**, 1087
- i. X. Yang et al, *J. Phys. Chem. A.*, 2009, **113**, 8307
- j. M. D. Allendorf and R. J. Kee, *J. Electrochem. Soc.*, 1991, **138**, 841
- k. D. L. Baulch et al, *J. Phys. Chem. Ref. Data*, 1992, **21**, 411
- l. A. Rhallabi and Y. Catherine, *IEEE Trans. Plasma Sci.*, 1991, **19**, 270
- m. C. D. Pintassilgo et al, *Plasma Sources Sci. Technol.*, 1999, **8**, 463
- n. S. G. Davis et al, *J. Phys. Chem. A.*, 1999, **103**, 5889
- o. E. W. Diau et al, *J. Chem. Phys.*, 1994, **101**, 3923
- p. N. S. Titova et al, *Combust. Explos. Shock Waves*, 2011, **47**, 249
- q. L. B. Harding et al, *J. Phys. Chem. A.*, 2005, **109**, 4646
- r. L. B. Harding et al, *J. Phys. Chem. A.*, 2007, **111**, 3789
- s. K. H. Homann and Ch. Wellmann, *Ber. Bunsenges. Phys. Chem.*, 1983, **87**, 609
- t. T. Kakumoto et al, *J. Phys. Chem.*, 1987, **91**, 183
- u. C. H. Wu and R. D. Kern, *J. Phys. Chem.*, 1987, **91**, 6291
- v. J. Warnatz, in "Combustion Chemistry", W. C. Gardiner, Jr. ed., Springer-Verlag, 1984
- w. W. Tsang, *J. Phys. Chem. Ref. Data*, 1988, **17**, 887
- x. Y. Hidaka et al, *Int. J. Chem. Kinet.*, 1992, **24**, 761
- y. W. Tsang, *J. Phys. Chem. Ref. Data*, 1990, **19**, 1
- z. W. Tsang and J. A. Walker, *Symp. Int. Combust. Proc.*, 1989, **22**, 1015

Table S2 Decomposition of TMGa.

|    | Reaction                                                                                  | A (m <sup>3</sup> , mol, s) | n     | Ea/R (K) |
|----|-------------------------------------------------------------------------------------------|-----------------------------|-------|----------|
| 1  | $\text{TMGa} \rightarrow \text{CH}_3 + \text{DMGa}$                                       | $0.1000 \cdot 10^{48}$      | -9.18 | 39000    |
| 2  | $\text{CH}_3 + \text{DMGa} \rightarrow \text{TMGa}$                                       | $0.7130 \cdot 10^{29}$      | -8.17 | 3600     |
| 3  | $\text{DMGa} \rightarrow \text{CH}_3 + \text{MMGa}$                                       | $0.7670 \cdot 10^{44}$      | -9.80 | 17000    |
| 4  | $\text{CH}_3 + \text{MMGa} \rightarrow \text{DMGa}$                                       | $0.3040 \cdot 10^{28}$      | -8.81 | 2300     |
| 5  | $\text{MMGa} \rightarrow \text{CH}_3 + \text{Ga}$                                         | $0.1680 \cdot 10^{31}$      | -5.07 | 42000    |
| 6  | $\text{CH}_3 + \text{Ga} \rightarrow \text{MMGa}$                                         | $0.8930 \cdot 10^{15}$      | -4.07 | 1300     |
| 7  | $\text{TMGa} + \text{NH}_3 \rightarrow \text{TMGaNH}_3$                                   | $0.2280 \cdot 10^{23}$      | -8.31 | 1600     |
| 8  | $\text{TMGa} + \text{NH}_3 \rightarrow \text{CH}_4 + \text{Ga}(\text{CH}_3)_2\text{NH}_2$ | $0.1700 \cdot 10^{-7}$      | 2.00  | 10000    |
| 9  | $\text{DMGa} + \text{NH}_3 \rightarrow \text{DMGaNH}_3$                                   | $0.4080 \cdot 10^{19}$      | -7.03 | 1600     |
| 10 | $\text{DMGa} + \text{NH}_3 \rightarrow \text{CH}_4 + \text{GaCH}_3\text{NH}_2$            | $0.5300 \cdot 10^{-6}$      | 1.56  | 10000    |
| 11 | $\text{MMGa} + \text{NH}_3 \rightarrow \text{MMGaNH}_3$                                   | $0.7950 \cdot 10^{13}$      | -5.21 | 1100     |
| 12 | $\text{MMGa} + \text{NH}_3 \rightarrow \text{CH}_4 + \text{GaNh}_2$                       | $0.8100 \cdot 10^{-6}$      | 1.30  | 8900     |
| 13 | $\text{CH}_3 + \text{NH}_3 \leftrightarrow \text{CH}_4 + \text{NH}_2$                     | $0.3410 \cdot 10^{-8}$      | 2.51  | 5000     |
| 14 | $\text{H} + \text{TMGa} \leftrightarrow \text{CH}_4 + \text{DMGa}$                        | $0.5000 \cdot 10^2$         | 0.00  | 5100     |
| 15 | $\text{H} + \text{DMGa} \leftrightarrow \text{CH}_4 + \text{MMGa}$                        | $0.5000 \cdot 10^{11}$      | 0.00  | 5100     |
| 16 | $\text{TMGaNH}_3 \leftrightarrow 2 \text{CH}_3 + \text{MMGa} + \text{NH}_3$               | $0.1330 \cdot 10^{45}$      | -8.24 | 39000    |

Reference: D. Sengupta, S. Mazumder, W. Kuykendall and S. A. Lowry, *J. Cryst. Growth*, 2005, **279**, 369.

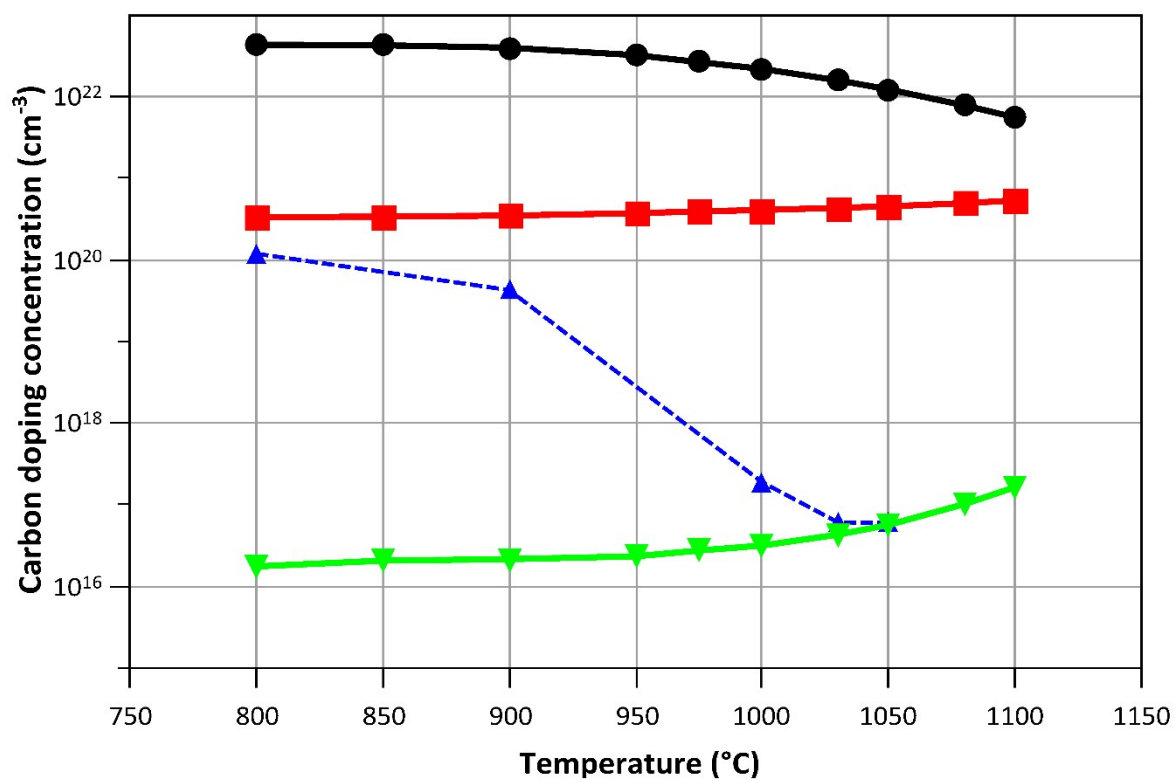

Fig. S6 Contribution to doping from different molecules as calculated by the model, without taking into account any removal of CH<sub>3</sub> groups: GaCH<sub>3</sub> (—●—), CH<sub>3</sub> (—■—) and C<sub>2</sub>H<sub>x</sub> (—◆—). Measured doping concentrations (—▲—) are shown for comparison.
